# Supplementary material for: G3’MTMD3 in the insect GABA receptor subunit, RDL, confers resistance to broflanilide and fluralaner
Source: PubMed Central journal article supplement (PMC10337980; doi:10.1371/journal.pgen.1010814), 2023-06-29
Supplement: pgen.1010814.s002.pdf [file pgen.1010814.s002.pdf]

S1 Fig

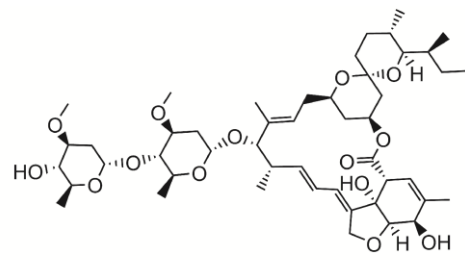

**1985** Avermectin **macrocyclic lactone**

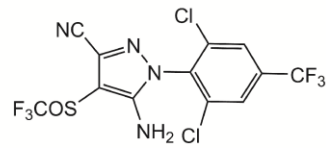

**1988** Fipronil **phenylpyrazole**

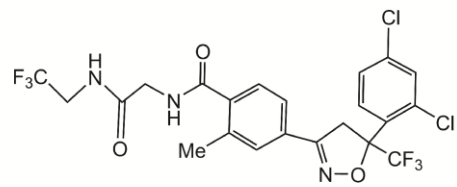

**2010** Fluralaner **isoxazoline**

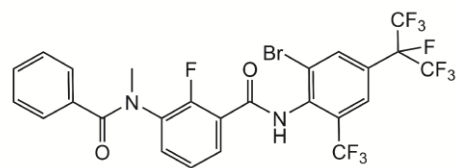

**2013** Broflanilide **meta-diamide**
