# Supplementary material for: G3’MTMD3 in the insect GABA receptor subunit, RDL, confers resistance to broflanilide and fluralaner
Source: PubMed Central journal article supplement (PMC10337980; doi:10.1371/journal.pgen.1010814), 2023-06-29
Supplement: pgen.1010814.s004.pdf [file pgen.1010814.s004.pdf]

|                     |                                                                                                             |     |
|---------------------|-------------------------------------------------------------------------------------------------------------|-----|
| H.sapiens-alpha1    | .....SKVDRLSRIAPFLPLFGI                                                                                     | 433 |
| H.sapiens-alpha2    | .....SKVDRMSRVFPVFLFGI                                                                                      | 431 |
| H.sapiens-alpha3    | .....SKVDRKISRIFFVFLFAI                                                                                     | 468 |
| H.sapiens-alpha4    | TIG.....ATGKLSATFP.....FSAPFPSSGGSTSKDKVYARLLFFVFGA                                                         | 532 |
| H.sapiens-alpha5    | .....SKVDRMSRVFPVFLFGI                                                                                      | 439 |
| H.sapiens-alpha6    | .....NKVITRAPIQLSTFV.....FPPLSFAPGGSTSKDKVYARLLFFVFAAG                                                      | 431 |
| H.sapiens-beta1     | .....IDKWSRMFFFTITSLFNVV.....YMLVYVH.....                                                                   | 474 |
| H.sapiens-beta2     | .....IDKWSRIFFVFESFNIV.....YMLVYVH.....                                                                     | 474 |
| H.sapiens-beta3     | .....IDKWSRIFFVFESFNIV.....YMLVYVH.....                                                                     | 473 |
| H.sapiens-gamma1    | .....IDSYRIFFFTAFAL                                                                                         | 453 |
| H.sapiens-gamma2    | .....MDSYARIFFFTAFCFL                                                                                       | 455 |
| H.sapiens-gamma3    | .....LDSYRVFFFTSFL                                                                                          | 455 |
| R.norvegicus-alpha1 | .....SKVDRLSRIAPFLPLFGI                                                                                     | 432 |
| R.norvegicus-alpha2 | .....SKVDRMSRVFPVFLFGI                                                                                      | 484 |
| R.norvegicus-alpha3 | .....SKVDRKISRIFFVFLFAI                                                                                     | 470 |
| R.norvegicus-alpha4 | TTG.....VFGNVATFP.....FSAPFPSSGGSTSKDKVYARLLFFVFGA                                                          | 530 |
| R.norvegicus-alpha5 | .....SKVDRMSRVFPVFLFGI                                                                                      | 441 |
| R.norvegicus-alpha6 | .....SKVLSRTPLLESTFV.....FPLLLPAIGGTSKDKVYARLLFFVFAAG                                                       | 431 |
| R.norvegicus-beta1  | .....IDKWSRMFFFTITSLFNVV.....YMLVYVH.....                                                                   | 474 |
| R.norvegicus-beta2  | .....IDKWSRIFFVFESFNIV.....YMLVYVH.....                                                                     | 474 |
| R.norvegicus-beta3  | .....IDKWSRIFFVFESFNIV.....YMLVYVH.....                                                                     | 473 |
| R.norvegicus-gamma1 | .....IDSYRIFFFTAFAL                                                                                         | 453 |
| R.norvegicus-gamma2 | .....MDSYARIFFFTAFCFL                                                                                       | 454 |
| R.norvegicus-gamma3 | .....LDSYRVFFFTSFL                                                                                          | 453 |
| D.erio-alpha1       | .....SKVDRMSRVFPVFLFGI                                                                                      | 435 |
| D.erio-alpha4       | SKRFTLLSQSSSTSEGTSSFSQSRLLSPSSASQNAASSSSAKTTFPAPSTTVEFRSFGTIFAGSAPLHLLGFKLENIKKKAQAQCPAARATGGASDEXARLFFVFGA | 537 |
| D.erio-alpha6       | .....EAPRTRVFLIQSAPFFNNMLA.....GTSARLKYSRLLFFLAFGI                                                          | 373 |
| D.erio-beta2        | .....YMLVYVH.....                                                                                           | 519 |
| D.erio-gamma2       | .....IDSYRIFFFTAFAL                                                                                         | 464 |
| F.dominula-RDL      | .....KDISKLYGTFSD.....IDKYSRIFFVFCVFCNLM.....YMYVYLVHSVADVADLV                                              | 471 |
| H.saltator-RDL      | .....KDIITLYGTFSD.....IDKYSRIFFVFCVFCNLM.....YMYVYLVHSVADVADLV                                              | 472 |
| L.atriatella-RDL    | .....KDISKLYGTFSD.....IDKYSRIFFVFCVFCNLM.....YMYVYLVHSVADVADLV                                              | 471 |
| A.mellifera-RDL     | .....KDISKLYGTFSD.....IDKYSRIFFVFCVFCNLM.....YMYVYLVHSVADVADLV                                              | 470 |
| T.castaneum-RDL     | .....KDISKLYGTFSD.....IDKYSRIFFVFCVFCNLM.....YMYVYLVHSVADVADLV                                              | 476 |
| C.felis-RDL         | .....KDISKLYGTFSD.....IDKYSRIFFVFCVFCNLM.....YMYVYLVHSVADVADLV                                              | 477 |
| N.lugens-RDL        | .....KDISKLYGTFSD.....IDKYSRIFFVFCVFCNLM.....YMYVYLVHSVADVADLV                                              | 472 |
| D.melanogaster-RDL  | .....KDISKLYGTFSD.....IDKYSRIFFVFCVFCNLM.....YMYVYLVHSVADVADLV                                              | 601 |
| B.mori-RDL2         | .....KDISKLYGTFSD.....IDKYSRIFFVFCVFCNLM.....YMYVYLVHSVADVADLV                                              | 489 |
| B.mori-RDL3         | .....KDISKLYGTFSD.....IDKYSRIFFVFCVFCNLM.....YMYVYLVHSVADVADLV                                              | 484 |
| B.mori-RDL1         | .....KDISKLYGTFSD.....IDKYSRIFFVFCVFCNLM.....YMYVYLVHSVADVADLV                                              | 476 |
| F.xylosteila-RDL2   | .....KDISKLYGTFSD.....IDKYSRIFFVFCVFCNLM.....YMYVYLVHSVADVADLV                                              | 514 |
| F.xylosteila-RDL1   | .....KDISKLYGTFSD.....IDKYSRIFFVFCVFCNLM.....YMYVYLVHSVADVADLV                                              | 479 |
| A.funeus-RDL        | .....KDISKLYGTFSD.....IDKYSRIFFVFCVFCNLM.....YMYVYLVHSVADVADLV                                              | 551 |
| D.simulans-RDL      | .....KDISKLYGTFSD.....IDKYSRIFFVFCVFCNLM.....YMYVYLVHSVADVADLV                                              | 601 |
| A.aegypti-RDL       | .....KDISKLYGTFSD.....IDKYSRIFFVFCVFCNLM.....YMYVYLVHSVADVADLV                                              | 527 |
| O.oryzae-RDL        | .....KDISKLYGTFSD.....IDKYSRIFFVFCVFCNLM.....YMYVYLVHSVADVADLV                                              | 469 |
| M.domestica-RDL     | .....KDISKLYGTFSD.....IDKYSRIFFVFCVFCNLM.....YMYVYLVHSVADVADLV                                              | 570 |
| S.furcifera-RDL     | .....KDISKLYGTFSD.....IDKYSRIFFVFCVFCNLM.....YMYVYLVHSVADVADLV                                              | 473 |
| N.vitripennis-RDL   | .....KDISKLYGTFSD.....IDKYSRIFFVFCVFCNLM.....YMYVYLVHSVADVADLV                                              | 433 |
| L.cuprina-RDL       | .....KDISKLYGTFSD.....IDKYSRIFFVFCVFCNLM.....YMYVYLVHSVADVADLV                                              | 545 |
| S.litura-RDL1       | .....KDISKLYGTFSD.....IDKYSRIFFVFCVFCNLM.....YMYVYLVHSVADVADLV                                              | 479 |
| S.litura-RDL2       | .....KDISKLYGTFSD.....IDKYSRIFFVFCVFCNLM.....YMYVYLVHSVADVADLV                                              | 493 |
| T.cinnabarinus-RDL3 | .....EPPPTPIKTRHSTGKCKNPN.....RLGVSP.....SDIKYSRVVFCVFCIC                                                   | 703 |
| T.cinnabarinus-RDL2 | .....FGNCPPTFVFGKCPNPN.....RLGVSP.....SDIKYSRVVFCVFCIC                                                      | 503 |
| T.cinnabarinus-RDL1 | .....FGNCPPTFVFGKCPNPN.....RLGVSP.....SDIKYSRVVFCVFCIC                                                      | 757 |
| C.sallei-RDL        | .....FS.....TLGVTF.....SDIKYSRVVFCVFCIC                                                                     | 456 |
| C.suppressalis-RDL1 | .....KDISKLYGTFSD.....IDKYSRIFFVFCVFCNLM.....YMYVYLVHSVADVADLV                                              | 479 |
| C.suppressalis-RDL2 | .....KDISKLYGTFSD.....IDKYSRIFFVFCVFCNLM.....YMYVYLVHSVADVADLV                                              | 490 |
| Consensus           | .....KDISKLYGTFSD.....IDKYSRIFFVFCVFCNLM.....YMYVYLVHSVADVADLV                                              |     |

|                     |                                                                                           |     |
|---------------------|-------------------------------------------------------------------------------------------|-----|
| H.sapiens-alpha1    | .....MRSKGLSDCLWAWILLSTLGRSY.GGFSLQ.....DELKDN.....TTVETRIIDRLDGDVNR                      | 56  |
| H.sapiens-alpha2    | .....MFTKLNLYMGLFVFLVWDFARLV.LANICE.....DEAKNN.....TTVETRIIDRLDGDVNR                      | 56  |
| H.sapiens-alpha3    | .....MIIQTSHCVMSLGLFELHLLKFTIQGGERPQGFVQDGLGSESRV.HAPDIP.....DESDN.....TTVETRIIDRLDGDVNR  | 61  |
| H.sapiens-alpha4    | .....MYSARVPAALSGASVAFRLFLCLACV.LNESPQN.....GHEEKLCETETRIIDRLDGDVNR                       | 62  |
| H.sapiens-alpha5    | .....MNDGMSGFMIMRNLFCISMNLSH.FGFSQMTSSVQDETNDN.....TTVETRIIDRLDGDVNR                      | 63  |
| H.sapiens-alpha6    | .....MASSLFWLCLIL.LENALGHL.....EVEGNFYEMVSRIDMLDGDVNR                                     | 46  |
| H.sapiens-beta1     | .....MWTQVRESLGLLSEFVIMT.....VCCAR..STNEFS.N.MS.....YVETVTR.LL.R..GVDLR                   | 51  |
| H.sapiens-beta2     | .....MNVRRRGVYGIWSEFLIAA.....VCAQ..SVNDF.N.MS.....LVETVTR.LL.R..GVDLR                     | 50  |
| H.sapiens-beta3     | .....MCSGLELLFIMLWSTLGR.....GSEF..RSVND.FGN.MS.....FVETVTR.LL.R..GVDLR                    | 51  |
| H.sapiens-gamma1    | .....MGLFPAFLFSPFL.LKQSGRVRLVLLTLHLGNCVADDEDEEDLTVN.R.TWVLA.....R.H.....EGVITVILNHLRDXK   | 78  |
| H.sapiens-gamma2    | .....MSSFNWSTGSSVYIF.....MMLLWFLFSLM.HENAGGL.....EDEGNFYEMVSRIDMLDGDVNR                   | 63  |
| H.sapiens-gamma3    | .....MREKLLLLCLFSLHARSRVVEEEDSDSN.Q.KWVLA.....P.SC.....DIVVILNHLRDXK                      | 61  |
| R.norvegicus-alpha1 | .....MRSKGLSDCLWAWILLSTLGRSY.GGFSLQ.....DELKDN.....TTVETRIIDRLDGDVNR                      | 55  |
| R.norvegicus-alpha2 | .....MFTKLNLYMGLFVFLVWDFARLV.LANICE.....DEAKNN.....TTVETRIIDRLDGDVNR                      | 109 |
| R.norvegicus-alpha3 | .....MIIQTSHCVMSLGLFELHLLKFTIQGGERPQGFVQDGLGSESRV.HAPDIP.....DESDN.....TTVETRIIDRLDGDVNR  | 61  |
| R.norvegicus-alpha4 | .....MYSARVPAALSGASVAFRLFLCLACV.LNESPQN.....GHEEKLCETETRIIDRLDGDVNR                       | 62  |
| R.norvegicus-alpha5 | .....MNDGMSGFMIMRNLFCISMNLSH.FGFSQMTSSVQDETNDN.....TTVETRIIDRLDGDVNR                      | 63  |
| R.norvegicus-alpha6 | .....MASSLFWLCLIL.LENALGHL.....EVEGNFYEMVSRIDMLDGDVNR                                     | 46  |
| R.norvegicus-beta1  | .....MWTQVRESLGLLSEFVIMT.....VCCAR..STNEFS.N.MS.....YVETVTR.LL.R..GVDLR                   | 51  |
| R.norvegicus-beta2  | .....MNVRRRGVYGIWSEFLIAA.....VCAQ..SVNDF.N.MS.....LVETVTR.LL.R..GVDLR                     | 50  |
| R.norvegicus-beta3  | .....MCSGLELLFIMLWSTLGR.....GSEF..RSVND.FGN.MS.....FVETVTR.LL.R..GVDLR                    | 51  |
| R.norvegicus-gamma1 | .....MGLFPAFLFSPFL.LKQSGRVRLVLLTLHLGNCVADDEDEEDLTVN.R.TWVLA.....R.H.....EGVITVILNHLRDXK   | 78  |
| R.norvegicus-gamma2 | .....MSSFNWSTGSSVYIF.....MMLLWFLFSLM.HENAGGL.....EDEGNFYEMVSRIDMLDGDVNR                   | 79  |
| R.norvegicus-gamma3 | .....MREKLLLLCLFSLHARSRVVEEEDSDSN.Q.KWVLA.....P.SC.....DIVVILNHLRDXK                      | 61  |
| D.erio-alpha1       | .....MMSGGRGANWIMWACLIVNALAGK.SSSQNA.....DEQDN.....TTVETRIIDRLDGDVNR                      | 56  |
| D.erio-alpha4       | .....MYSARVPAALSGASVAFRLFLCLACV.LNESPQN.....GHEEKLCETETRIIDRLDGDVNR                       | 62  |
| D.erio-alpha6       | .....MIIQTSHCVMSLGLFELHLLKFTIQGGERPQGFVQDGLGSESRV.HAPDIP.....DESDN.....TTVETRIIDRLDGDVNR  | 61  |
| D.erio-beta2        | .....MESIGHTPHILLCPLIVAV.....ACAC..SIRDF.N.ME.....YVETVTR.LL.R..GVDLR                     | 49  |
| D.erio-gamma2       | .....MVMASLHFSHCINAMAFVTLRLMAFLIAHLFSLVQLESDD..DEVIN.R.TWVLA.....R.VY.....ESVITVILNHLRDXK | 80  |
| F.dominula-RDL      | .....MRSLHNASWFALLAATVALLPAPTHA.....FFAHAATGGGSM.L.G.DV.....NISALDLS.FSV..SVDLR           | 59  |
| H.saltator-RDL      | .....MGSFVHNASWFALLAATVALLPAPTHA.....FFAHAATGGGSM.L.G.DV.....NISALDLS.FSV..SVDLR          | 59  |
| L.atriatella-RDL    | .....MRSALWLVAVITILLPAPDRP.....FVL.AGTGGGSM.L.G.DV.....NISALDLS.FSV..SVDLR                | 55  |
| A.mellifera-RDL     | .....MRSFNASWFALLAATVALLPAPTHA.....FFAQAATGGGSM.L.G.DV.....NISALDLS.FSV..SVDLR            | 58  |
| T.castaneum-RDL     | .....MGSFVHNASWFALLAATVALLPAPTHA.....FFAQAATGGGSM.L.G.DV.....NISALDLS.FSV..SVDLR          | 51  |
| C.felis-RDL         | .....MRSALWLVAVITILLPAPDRP.....FVL.AGTGGGSM.L.G.DV.....NISALDLS.FSV..SVDLR                | 57  |
| N.lugens-RDL        | .....MRSALWLVAVITILLPAPDRP.....FVL.AGTGGGSM.L.G.DV.....NISALDLS.FSV..SVDLR                | 56  |
| D.melanogaster-RDL  | .....MRSALWLVAVITILLPAPDRP.....FVL.AGTGGGSM.L.G.DV.....NISALDLS.FSV..SVDLR                | 73  |
| B.mori-RDL2         | .....MHSNTRRGVHI.AVVGLAIAWLFHAD.....HAAGT..GGGMF.G.DV.....NISALDLS.FSV..SVDLR             | 57  |
| B.mori-RDL3         | .....MSAVRHAI..LLALAAFLPCAN.....RVAGG..GGGMF.G.DV.....NISALDLS.FSV..SVDLR                 | 52  |
| B.mori-RDL1         | .....MSGAKERTAP..LLALAAFLPCAN.....RVAGG..GGGMF.G.DV.....NISALDLS.FSV..SVDLR               | 54  |
| F.xylosteila-RDL2   | .....MCGRGRGVPGAVVLLAVALCFHAD.....HAAGA..GGGMF.G.DV.....NISALDLS.FSV..SVDLR               | 57  |
| F.xylosteila-RDL1   | .....MCGRGRGVPGAVVLLAVALCFHAD.....HAAGA..GGGMF.G.DV.....NISALDLS.FSV..SVDLR               | 54  |
| A.funeus-RDL        | .....MSLIEVPHARSVGLVITLMAFLPQINRFPYVLAGTGGGSM.L.G.DV.....NISALDLS.FSV..SVDLR              | 74  |
| D.simulans-RDL      | .....MRSALWLVAVITILLPAPDRP.....FVL.AGTGGGSM.L.G.DV.....NISALDLS.FSV..SVDLR                | 53  |
| A.aegypti-RDL       | .....MSLIEVPHARSVGLVITLMAFLPQINRFPYVLAGTGGGSM.L.G.DV.....NISALDLS.FSV..SVDLR              | 68  |
| O.oryzae-RDL        | .....MGSFVHNASWFALLAATVALLPAPTHA.....FFAQAATGGGSM.L.G.DV.....NISALDLS.FSV..SVDLR          | 51  |
| M.domestica-RDL     | .....MRSALWLVAVITILLPAPDRP.....FVL.AGTGGGSM.L.G.DV.....NISALDLS.FSV..SVDLR                | 71  |
| S.furcifera-RDL     | .....MRSALWLVAVITILLPAPDRP.....FVL.AGTGGGSM.L.G.DV.....NISALDLS.FSV..SVDLR                | 56  |
| N.vitripennis-RDL   | .....MRSALWLVAVITILLPAPDRP.....FVL.AGTGGGSM.L.G.DV.....NISALDLS.FSV..SVDLR                | 20  |
| L.cuprina-RDL       | .....MRSALWLVAVITILLPAPDRP.....FVL.AGTGGGSM.L.G.DV.....NISALDLS.FSV..SVDLR                | 71  |
| S.litura-RDL1       | .....MHSNTRRGVHI.AVVGLAIAWLFHAD.....HAAGT..GGGMF.G.DV.....NISALDLS.FSV..SVDLR             | 54  |
| S.litura-RDL2       | .....MHSNTRRGVHI.AVVGLAIAWLFHAD.....HAAGT..GGGMF.G.DV.....NISALDLS.FSV..SVDLR             | 57  |
| T.cinnabarinus-RDL3 | .....MHSNTRRGVHI.AVVGLAIAWLFHAD.....HAAGT..GGGMF.G.DV.....NISALDLS.FSV..SVDLR             | 57  |
| T.cinnabarinus-RDL2 | .....MHSNTRRGVHI.AVVGLAIAWLFHAD.....HAAGT..GGGMF.G.DV.....NISALDLS.FSV..SVDLR             | 59  |
| T.cinnabarinus-RDL1 | .....MHSNTRRGVHI.AVVGLAIAWLFHAD.....HAAGT..GGGMF.G.DV.....NISALDLS.FSV..SVDLR             | 52  |
| C.sallei-RDL        | .....MREGMIAASMLCVLLAVALCFHAD.....HAAGA..GGGMF.G.DV.....NISALDLS.FSV..SVDLR               | 54  |
| C.suppressalis-RDL1 | .....MRSALWLVAVITILLPAPDRP.....FVL.AGTGGGSM.L.G.DV.....NISALDLS.FSV..SVDLR                | 52  |
| C.suppressalis-RDL2 | .....MHSNTRRGVHI.AVVGLAIAWLFHAD.....HAAGT..GGGMF.G.DV.....NISALDLS.FSV..SVDLR             | 57  |
| Consensus           | .....MRSALWLVAVITILLPAPDRP.....FVL.AGTGGGSM.L.G.DV.....NISALDLS.FSV..SVDLR                |     |

|                     |                                |     |
|---------------------|--------------------------------|-----|
| H.sapiens-alpha1    | FNLVYVWATYLNREPFQLKAPTFHG...   | 456 |
| H.sapiens-alpha2    | FNLVYVWATYLNREPFVLGVSP.....    | 451 |
| H.sapiens-alpha3    | FNLVYVWATYVNRRESAIRGMIRKQ...   | 491 |
| H.sapiens-alpha4    | FNLVYVWVYVLSKRDIMERSESLM...    | 554 |
| H.sapiens-alpha5    | FNLVYVWATYLNREPFVIRGAASPR...   | 462 |
| H.sapiens-alpha6    | FNLVYVWVYVLSKRDIMEVSSSVE....   | 453 |
| H.sapiens-beta1     | .....                          | 474 |
| H.sapiens-beta2     | .....                          | 474 |
| H.sapiens-beta3     | .....                          | 473 |
| H.sapiens-gamma1    | FNLVYVWVGYLYL.....             | 465 |
| H.sapiens-gamma2    | FNLVYVWVGYLYL.....             | 467 |
| H.sapiens-gamma3    | FNLVYVWVGYLYL.....             | 467 |
| R.norvegicus-alpha1 | FNLVYVWATYLNREPFQLKAPTFHG...   | 455 |
| R.norvegicus-alpha2 | FNLVYVWATYLNREPFVLGVSP.....    | 504 |
| R.norvegicus-alpha3 | FNLVYVWATYVNRRESAIRGMIRKQ...   | 493 |
| R.norvegicus-alpha4 | FNLVYVWVYVLSKRDIMERSESLM...    | 552 |
| R.norvegicus-alpha5 | FNLVYVWATYLNREPFVIRGATSPF...   | 464 |
| R.norvegicus-alpha6 | FNLVYVWVYVLSKRDIMEVSSSVE....   | 453 |
| R.norvegicus-beta1  | .....                          | 474 |
| R.norvegicus-beta2  | .....                          | 474 |
| R.norvegicus-beta3  | .....                          | 473 |
| R.norvegicus-gamma1 | FNLVYVWVGYLYL.....             | 465 |
| R.norvegicus-gamma2 | FNLVYVWVGYLYL.....             | 466 |
| R.norvegicus-gamma3 | FNLVYVWVGYLYL.....             | 467 |
| D.rerio-alpha1      | FNLVYVWATYLNREPFQLQGMNLEGFH... | 459 |
| D.rerio-alpha4      | FNLVYVWVYVLSKRDIMEVSSSVE....   | 557 |
| D.rerio-alpha6      | FNLVYVWVYVLSKRDIMEVSSSVE....   | 395 |
| D.rerio-beta2       | .....                          | 519 |
| D.rerio-gamma2      | FNLVYVWVGYLYL.....             | 476 |
| P.dominula-RDL      | LLREAK.....                    | 477 |
| H.saltator-RDL      | LLREAK.....                    | 470 |
| L.striatella-RDL    | LLREAK.....                    | 487 |
| A.mellifera-RDL     | LLREAK.....                    | 476 |
| T.castaneum-RDL     | LLRECK.....                    | 482 |
| C.felis-RDL         | LLGECK.....                    | 483 |
| N.lugens-RDL        | LLRECK.....                    | 478 |
| D.melanogaster-RDL  | LLGEE.....                     | 606 |
| B.mori-RDL2         | LLGEEN.....                    | 495 |
| B.mori-RDL3         | LLRECK.....                    | 489 |
| B.mori-RDL1         | LLGECK.....                    | 492 |
| P.xylostella-RDL2   | LLGDIN.....                    | 520 |
| P.xylostella-RDL1   | LLRECK.....                    | 485 |
| A.funestus-RDL      | LLGECK.....                    | 557 |
| D.simulans-RDL      | LLGEE.....                     | 606 |
| A.aegypti-RDL       | LLGECK.....                    | 533 |
| O.oryzae-RDL        | LLRECK.....                    | 475 |
| M.domestica-RDL     | LLRECK.....                    | 576 |
| S.furcifera-RDL     | LLRECK.....                    | 479 |
| N.vitripennis-RDL   | FNLVYVWVYVLSKRDIMEVSSSVE....   | 459 |
| L.cuprina-RDL       | LLGEE.....                     | 550 |
| S.litura-RDL1       | LLRECK.....                    | 485 |
| S.litura-RDL2       | LLGEEN.....                    | 499 |
| T.cinnabarinus-RDL3 | FNLVYVWVYVLSKRDIMEVSSSVE....   | 728 |
| T.cinnabarinus-RDL2 | FNLVYVWVYVLSKRDIMEVSSSVE....   | 522 |
| T.cinnabarinus-RDL1 | FNLVYVWVYVLSKRDIMEVSSSVE....   | 781 |
| C.salei-RDL         | FNLVYVWVYVLSKRDIMEVSSSVE....   | 478 |
| C.suppressalis-RDL1 | LLRECK.....                    | 485 |
| C.suppressalis-RDL2 | LLGEEN.....                    | 496 |
| Consensus           |                                |     |
