# Supplementary material for: G3’MTMD3 in the insect GABA receptor subunit, RDL, confers resistance to broflanilide and fluralaner
Source: PubMed Central journal article supplement (PMC10337980; doi:10.1371/journal.pgen.1010814), 2023-06-29

**S5 Fig**

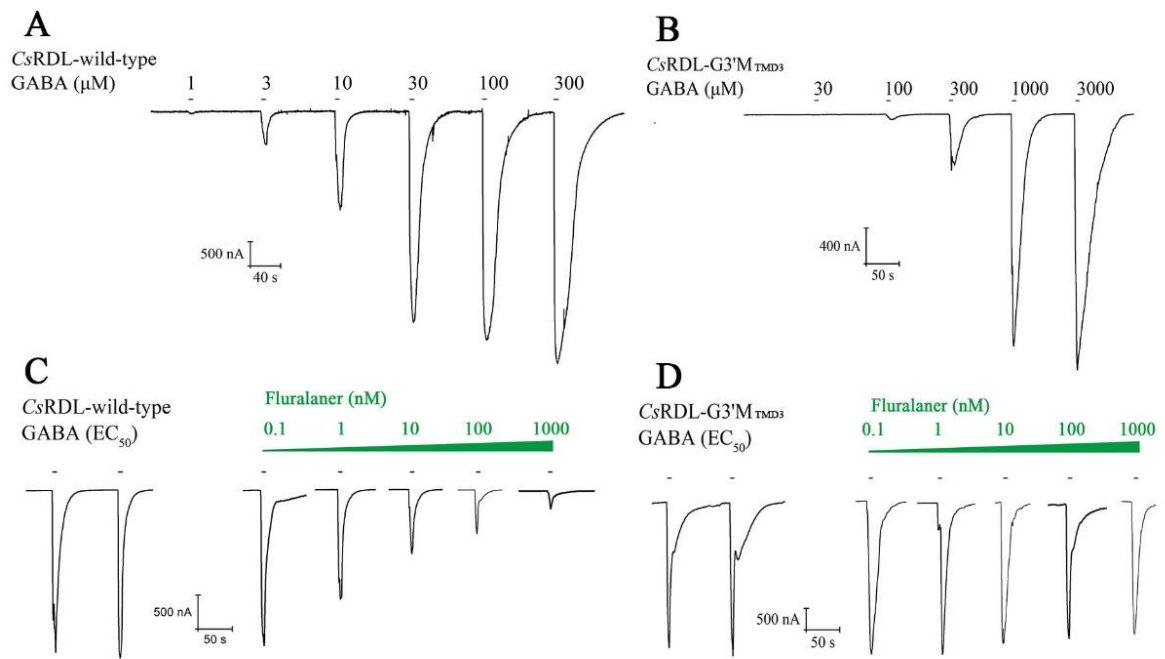

Supplement: pgen.1010814.s006.pdf [file pgen.1010814.s006.pdf]
