# Supplementary material for: G3’MTMD3 in the insect GABA receptor subunit, RDL, confers resistance to broflanilide and fluralaner
Source: PubMed Central journal article supplement (PMC10337980; doi:10.1371/journal.pgen.1010814), 2023-06-29
Supplement: pgen.1010814.s009.pdf [file pgen.1010814.s009.pdf]

**S1 Table. Prediction of potential amino acid residues in CsRDL interacting with fluralaner**

| Transmembrane domain | Position on CsRDL | WT | Mutation  | Binding energy |           |           |           | No. |
|----------------------|-------------------|----|-----------|----------------|-----------|-----------|-----------|-----|
|                      |                   |    |           | WT             | Mutation  |           |           |     |
| TMD1                 | 258 (228)         | I  | T         | 4.5215(I)      | 4.5902(T) |           |           | 1   |
|                      | 260 (230)         | I  | L/M       | 4.2084(I)      | 5.3753(L) | 4.6323(M) |           | 2   |
|                      | 262 (232)         | S  | C         | 4.4730(S)      | 4.4480(C) |           |           | 3   |
|                      | 263 (233)         | G  | I         | 4.7443(G)      | 5.4000(I) |           |           | 4   |
|                      | 264 (234)         | L  | M         | 3.9282(L)      | 3.6924(M) |           |           | 5   |
|                      | 265 (235)         | I  | T         | 3.7468(I)      | 4.8598(M) |           |           | 6   |
|                      | 268 (238)         | I  | L         | 4.8808(I)      | 4.2732(L) |           |           | 7   |
|                      | 275 (245)         | L  | I         | 1.4511(L)      | 3.6435(I) |           |           | 8   |
| TMD2                 | 284 (254)         | V  | T         | 3.5264(V)      | 4.1300(T) |           |           | 9   |
|                      | 288 (258)         | V  | I         | 5.4886(V)      | 2.9646(I) |           |           | 10  |
|                      | 298 (268)         | M  | S/N       | 5.4843(M)      | 4.6268(S) | 4.4541(N) |           | 11  |
|                      | 299 (269)         | S  | I/T       | 6.1474(S)      | 5.4397(I) | 5.7228(T) |           | 12  |
|                      | 301 (271)         | T  | A/L       | 6.6488(T)      | 6.2552(A) | 5.8912(L) |           | 13  |
|                      | 302 (272)         | N  | R         | 3.9210(N)      | 5.0899(R) |           |           | 14  |
|                      | 303 (273)         | A  | N/E/K     | 4.9935(A)      | 3.7599(N) | 4.1328(E) | 4.5773(K) | 15  |
|                      | 304 (274)         | A  | S/T       | 4.8820(A)      | 3.7685(S) | 4.8886(T) |           | 16  |
| TMD3                 | 317 (287)         | Y  | F         | 4.8300(Y)      | 7.2348(F) |           |           | 17  |
|                      | 318 (288)         | L  | I/V       | 3.7757(L)      | 5.4566(I) | 4.8602(V) |           | 18  |
|                      | 319 (289)         | G  | A/M/S     | 5.0231(G)      | 4.8663(A) | 5.6859(M) | 7.5320(S) | 19  |
|                      | 320 (290)         | T  | V/G       | 4.4847(T)      | 4.9667(V) | 4.6417(G) |           | 20  |
|                      | 323 (293)         | V  | A         | 4.2857(V)      | 3.8009(A) |           |           | 21  |
|                      | 324 (294)         | M  | F         | 4.4061(M)      | 5.2403(F) |           |           | 22  |
|                      | 327 (297)         | A  | S         | 3.5754(A)      | 2.5077(S) |           |           | 23  |
|                      | 328 (298)         | S  | A         | 1.9168(S)      | 2.0141(A) |           |           | 24  |
|                      | 330 (300)         | L  | I/M       | 4.1681(L)      | 3.5937(I) | 3.9840(M) |           | 25  |
|                      | 336 (306)         | G  | N         | 4.3093(G)      | 5.1995(N) |           |           | 26  |
|                      | 338 (308)         | M  | I         | 4.4562(M)      | 5.0653(I) |           |           | 27  |
| 339 (309)            | A                 | F  | 5.7805(A) | 5.8155(F)      |           |           | 28        |     |
| TMD4                 | 462 (325)         | V  | F         | 4.7601(V)      | 4.6287(F) |           |           | 29  |
|                      | 466 (329)         | C  | T         | 3.0400(C)      | 4.7353(T) |           |           | 30  |
|                      | 468 (331)         | V  | S         | 3.8259(V)      | 3.4912(S) |           |           | 31  |
|                      | 469 (332)         | C  | F/L       | 3.6769(C)      | 4.1046(F) | 5.1194(L) |           | 32  |
|                      | 473 (336)         | M  | V         | 3.3124(M)      | 6.2653(V) |           |           | 33  |
|                      | 474 (337)         | Y  | S         | 4.8024(Y)      | 5.5412(S) |           |           | 34  |
|                      | 477 (340)         | I  | D/Y       | 6.0092(I)      | 2.9393(D) | 4.8363(Y) |           | 35  |

Note, amino acid residues in red were selected for functional expression studies.
