# Supplementary material for: G3’MTMD3 in the insect GABA receptor subunit, RDL, confers resistance to broflanilide and fluralaner
Source: PubMed Central journal article supplement (PMC10337980; doi:10.1371/journal.pgen.1010814), 2023-06-29
Supplement: pgen.1010814.s010.pdf [file pgen.1010814.s010.pdf]

**S2 Table. Potencies of GABA on *X. laevis* oocytes injected with CsRDL cRNA**

|           | <b>cRNA</b>          | <b>EC<sub>50</sub> (95% CI) (μM)</b>  | <b>Hill Slope (95% CI)</b> | <b>I<sub>max</sub> ± SE (nA)</b> | <b>Number</b> |
|-----------|----------------------|---------------------------------------|----------------------------|----------------------------------|---------------|
| <b>1</b>  | wild-type            | 18.07 (13.94-23.42)                   | 1.86 (1.09-2.62)           | -5663 ± 394                      | 6             |
| <b>2</b>  | I258T                | 26.69 (17.96-39.67)                   | 0.95 (0.63-1.28)           | -575 ± 223****                   | 5             |
| <b>3</b>  | L275I                | 50.46 <sup>#</sup> (43.73-58.23)      | 2.48 (1.89-3.06)           | -4526 ± 791                      | 5             |
| <b>4</b>  | V288I                | 170.80 <sup>#</sup> (153.80-189.70)   | 1.96 (1.63-2.30)           | -2134 ± 775**                    | 5             |
| <b>5</b>  | M298N                | 161.60 <sup>#</sup> (117.50-222.40)   | 1.15 (0.77-1.53)           | -186 ± 90****                    | 5             |
| <b>6</b>  | AA303-304NS          | 319.80 <sup>#</sup> (268.60-380.70)   | 1.76 (1.26-2.26)           | -2698 ± 961**                    | 5             |
| <b>7</b>  | G3'M <sub>TMD3</sub> | 615.90 <sup>#</sup> (506.80-748.50)   | 1.41 (1.08-1.74)           | -6265 ± 753                      | 5             |
| <b>8</b>  | G319S                | 1156.00 <sup>#</sup> (977.00-1368.00) | 2.84 (1.19-4.48)           | -3413 ± 1025*                    | 5             |
| <b>9</b>  | A327S                | 108.60 <sup>#</sup> (89.24-132.20)    | 2.40 (1.10-3.70)           | -1735 ± 547****                  | 5             |
| <b>10</b> | G336N                | 140.00 <sup>#</sup> (124.10-158.10)   | 2.45 (1.85-3.05)           | -4949 ± 1366                     | 5             |
| <b>11</b> | MA338-339IF          | 121.40 <sup>#</sup> (90.61-162.70)    | 2.02 (0.89-3.15)           | -2021 ± 739***                   | 5             |
| <b>12</b> | M473V                | 17.58 (16.07-19.24)                   | 2.03 (1.72-2.33)           | -2363 ± 1101*                    | 5             |
| <b>13</b> | I477D                | ND                                    | ND                         | ND                               | 12            |

CI, confidence interval; ND, not detectable.

# indicates significant difference relative to wild-type CsRDL as determined by the 95% CI without overlapping.

\*, \*\*, \*\*\* and \*\*\*\* indicate significant difference relative to wild-type CsRDL as determined by Student's *t*-test with SPSS 17.0 (SPSS Inc., Chicago, IL) when  $P < 0.05$ ,  $P < 0.01$ ,  $P < 0.001$  or  $P < 0.0001$ , respectively.
