# Supplementary material for: G3’MTMD3 in the insect GABA receptor subunit, RDL, confers resistance to broflanilide and fluralaner
Source: PubMed Central journal article supplement (PMC10337980; doi:10.1371/journal.pgen.1010814), 2023-06-29
Supplement: pgen.1010814.s011.pdf [file pgen.1010814.s011.pdf]

**S3 Table. Inhibition of GABA-induced currents by fluralaner in *X. laevis* oocytes injected with CsRDL cRNA**

|          | <b>cRNA</b> | <b>IC<sub>50</sub> (95% CI) (nM)</b> | <b>Number</b> |           | <b>cRNA</b>          | <b>IC<sub>50</sub> (95% CI) (nM)</b> | <b>Number</b> |
|----------|-------------|--------------------------------------|---------------|-----------|----------------------|--------------------------------------|---------------|
| <b>1</b> | wild-type   | 4.20 (2.56-6.88)                     | 6             | <b>7</b>  | G3'M <sub>TMD3</sub> | >10,000*                             | 5             |
| <b>2</b> | I258T       | 9.39 (4.47-19.72)                    | 4             | <b>8</b>  | G319S                | 1.37 (0.73-2.57)                     | 5             |
| <b>3</b> | L275I       | 14.54 (4.78-44.26)                   | 4             | <b>9</b>  | A327S                | 4.92 (2.93-8.24)                     | 4             |
| <b>4</b> | V288I       | 13.08 (5.07-33.70)                   | 4             | <b>10</b> | G336N                | 5.74 (3.41-9.68)                     | 5             |
| <b>5</b> | M298N       | 2.06 (0.97-4.38)                     | 3             | <b>11</b> | M473V                | 13.20 (6.24-27.92)                   | 5             |
| <b>6</b> | AA303-304NS | 24.84* (14.07-43.86)                 | 4             | <b>12</b> | MA338-339IF          | 1.85 (0.73-4.67)                     | 4             |

CI, confidence interval

\* indicates significant difference relative to wild-type CsRDL as determined by the 95% CI without overlapping.
