# Supplementary material for: G3’MTMD3 in the insect GABA receptor subunit, RDL, confers resistance to broflanilide and fluralaner
Source: PubMed Central journal article supplement (PMC10337980; doi:10.1371/journal.pgen.1010814), 2023-06-29
Supplement: pgen.1010814.s012.pdf [file pgen.1010814.s012.pdf]

**S4 Table. Inhibition of GABA-induced currents by avermectin and fipronil in *X. laevis* oocytes injected with G3'M<sub>TMD3</sub> CsRDL cRNAs.**

| cRNA                 | IC <sub>50</sub> (95% CI) (nM) (number of oocytes) |                          |
|----------------------|----------------------------------------------------|--------------------------|
|                      | Fipronil                                           | Avermectin               |
| wild-type            | 10.02 (7.17-14.00) (5)                             | 69.90 (46.67-104.70) (4) |
| G3'M <sub>TMD3</sub> | 22.42* (14.15-35.51) (6)                           | > 10,000* (5)            |

CI, confidence interval.

\* indicates significant difference relative to wild-type CsRDL as determined by the 95% CI without overlapping.
