# Supplementary material for: G3’MTMD3 in the insect GABA receptor subunit, RDL, confers resistance to broflanilide and fluralaner
Source: PubMed Central journal article supplement (PMC10337980; doi:10.1371/journal.pgen.1010814), 2023-06-29
Supplement: pgen.1010814.s013.pdf [file pgen.1010814.s013.pdf]

**S5 Table. Potencies of GABA and fluralaner on wild-type or G3'M<sub>TMD3</sub> RDL cRNA from different species expressed in *X. laevis* oocytes.**

| cRNA                               | Fluralaner                     | GABA                           |                     |
|------------------------------------|--------------------------------|--------------------------------|---------------------|
|                                    | IC <sub>50</sub> (95% CI) (nM) | EC <sub>50</sub> (95% CI) (μM) | Hill Slope (95% CI) |
| wild-type <i>Cs</i> RDL            | 4.51 (3.00-6.79)               | 38.32 (34.43-42.66)            | 1.87 (1.55-2.20)    |
| G3'M <sub>TMD3</sub> <i>Cs</i> RDL | > 10,000*                      | 1306* (1208-1413)              | 2.40 (1.99-2.81)    |
| wild-type <i>Ls</i> RDL            | 3.27 (1.90-5.62)               | 31.95 (27.90-36.60)            | 1.97 (1.45-2.48)    |
| G3'M <sub>TMD3</sub> <i>Ls</i> RDL | > 10,000*                      | 756.60* (687.20-833.10)        | 2.30 (1.85-2.75)    |
| wild-type <i>Am</i> RDL            | 9.38 (6.68-13.17)              | 13.37 (12.31-14.53)            | 2.62 (2.13-3.12)    |
| G3'M <sub>TMD3</sub> <i>Am</i> RDL | > 10,000*                      | 267.50* (203.90-351.00)        | 1.98 (0.939-3.02)   |
| wild-type <i>Dm</i> RDL            | 6.96 (2.70-17.95)              | 23.51 (20.88-26.48)            | 1.95 (1.53-2.36)    |
| G3'M <sub>TMD3</sub> <i>Dm</i> RDL | > 10,000*                      | 234.40* (198.00-277.40)        | 2.33 (1.48-3.18)    |
| wild-type <i>Tu</i> RDL            | 2.53 (1.53-4.19)               | 295.10 (232.70-374.10)         | 1.51 (1.02-2.00)    |
| G3'M <sub>TMD3</sub> <i>Tu</i> RDL | > 10,000*                      | 2360* (2094-2661)              | 2.23 (1.67-2.78)    |

Note, The different species used were *Chilo suppressalis* (*Cs*), *Laodelphax striatellus* (*Ls*), *Apis mellifera* (*Am*), *Drosophila melanogaster* (*Dm*) and *Tetranychus urticae* (*Tu*). CI, confidence interval.

\* indicates significant difference relative to wild-type RDL as determined by the 95% CI without overlapping.
