# Supplementary material for: G3’MTMD3 in the insect GABA receptor subunit, RDL, confers resistance to broflanilide and fluralaner
Source: PubMed Central journal article supplement (PMC10337980; doi:10.1371/journal.pgen.1010814), 2023-06-29
Supplement: pgen.1010814.s014.pdf [file pgen.1010814.s014.pdf]

**S6 Table. Potencies of GABA on heteromeric *Mma1β2* and *Mma1β2-M3'G<sub>TMD3</sub>***

**receptors expressed in *X. laevis* oocytes.**

| <b>cRNA</b>                       | <b>EC<sub>50</sub> (95% CI) (μM)</b> | <b>Hill Slope (95% CI)</b> | <b>Number</b> |
|-----------------------------------|--------------------------------------|----------------------------|---------------|
| <i>Mma1β2</i>                     | 9.18 (7.76-10.85)                    | 1.44 (1.13-1.75)           | 7             |
| <i>Mma1β2-M3'G<sub>TMD3</sub></i> | 3.25* (2.58-4.09)                    | 0.97 (0.77-1.17)           | 7             |

3

CI, confidence interval.

\* indicates significant difference relative to *Mma1β2* as determined by the 95% CI without overlapping.
