# Supplementary material for: G3’MTMD3 in the insect GABA receptor subunit, RDL, confers resistance to broflanilide and fluralaner
Source: PubMed Central journal article supplement (PMC10337980; doi:10.1371/journal.pgen.1010814), 2023-06-29
Supplement: pgen.1010814.s015.pdf [file pgen.1010814.s015.pdf]

**S7 Table. Inhibition by fluralaner on GABA-induced currents in *X. laevis* oocytes injected with *Mma1β2* or *Mma1β2*-M3'G<sub>TMD3</sub>**

| cRNA                                | Mean ± SE (%) (number) |                    |                     |                    |
|-------------------------------------|------------------------|--------------------|---------------------|--------------------|
|                                     | 10 <sup>-6</sup> M     | 10 <sup>-7</sup> M | 10 <sup>-8</sup> M  | 10 <sup>-9</sup> M |
| <i>Mma1β2</i>                       | 27.17 ± 4.42 (12)      | 26.22 ± 3.05 (15)  | 11.97 ± 2.00 (12)   | 3.23 ± 1.46 (5)    |
| <i>Mma1β2</i> -M3'G <sub>TMD3</sub> | 40.75 ± 4.50 (11)      | 28.69 ± 4.71 (10)  | 26.68 ± 3.90** (10) | 22.59 ± 3.25** (8) |

\*\* indicates significant difference relative to *Mma1β2* at the same concentration as determined by Student's *t*-test with SPSS 17.0 (SPSS Inc., Chicago, IL) when *P* < 0.01.
