# Supplementary material for: G3’MTMD3 in the insect GABA receptor subunit, RDL, confers resistance to broflanilide and fluralaner
Source: PubMed Central journal article supplement (PMC10337980; doi:10.1371/journal.pgen.1010814), 2023-06-29
Supplement: pgen.1010814.s016.pdf [file pgen.1010814.s016.pdf]

**S8 Table. Toxicity of four insecticides to *w<sup>1118</sup>* adults and heterozygous adults bearing G3'<sub>TMD3</sub> mutations**

| Insecticide  | Genotype                                           | Slope ± SE | LC <sub>50</sub> (95% CI <sup>†</sup> ) (mg/L) | χ <sup>2</sup> (df) | P value | RR <sup>‡</sup> |
|--------------|----------------------------------------------------|------------|------------------------------------------------|---------------------|---------|-----------------|
| Fipronil     | <i>w<sup>1118</sup></i>                            | 5.77±0.71  | 0.82 (0.76-0.89)                               | 7.73 (13)           | 0.861   | 1.00            |
|              | G3' <sub>TMD3</sub> /TM2 <i>Ubx<sup>130</sup></i>  | 5.23±0.67  | 0.78 (0.72-0.85)                               | 5.69 (13)           | 0.957   | 0.95            |
|              | G3' <sub>Q</sub> TMD3/TM2 <i>Ubx<sup>130</sup></i> | 4.61±0.63  | 0.84 (0.76-0.92)                               | 5.48 (13)           | 0.963   | 1.02            |
|              | G3' <sub>S</sub> TMD3/TM2 <i>Ubx<sup>130</sup></i> | 5.38±0.68  | 0.80 (0.74-0.87)                               | 2.93 (13)           | 0.998   | 0.98            |
| Avermectin   | <i>w<sup>1118</sup></i>                            | 1.74±0.23  | 33.80 (26.36-45.33)                            | 7.22 (13)           | 0.891   | 1.00            |
|              | G3' <sub>M</sub> TMD3/TM2 <i>Ubx<sup>130</sup></i> | 1.65±0.22  | 30.64 (23.70-41.14)                            | 6.08 (13)           | 0.943   | 0.91            |
|              | G3' <sub>Q</sub> TMD3/TM2 <i>Ubx<sup>130</sup></i> | 1.70±0.23  | 35.00 (27.16-47.36)                            | 7.42 (13)           | 0.879   | 1.04            |
|              | G3' <sub>S</sub> TMD3/TM2 <i>Ubx<sup>130</sup></i> | 1.60±0.22  | 29.67 (22.81-39.90)                            | 8.14 (13)           | 0.834   | 0.88            |
| Fluralaner   | <i>w<sup>1118</sup></i>                            | 2.07±0.25  | 1.89 (1.50-2.33)                               | 6.87 (13)           | 0.909   | 1.00            |
|              | G3' <sub>M</sub> TMD3/TM2 <i>Ubx<sup>130</sup></i> | 2.21±0.27  | 1.64 (1.31-2.00)                               | 4.21 (13)           | 0.989   | 0.87            |
|              | G3' <sub>Q</sub> TMD3/TM2 <i>Ubx<sup>130</sup></i> | 2.27±0.27  | 1.76 (1.42-2.14)                               | 9.19 (13)           | 0.759   | 0.93            |
|              | G3' <sub>S</sub> TMD3/TM2 <i>Ubx<sup>130</sup></i> | 2.26±0.27  | 1.75 (1.41-2.13)                               | 9.42 (13)           | 0.741   | 0.93            |
| Broflanilide | <i>w<sup>1118</sup></i>                            | 2.40±0.27  | 0.81 (0.66-0.97)                               | 8.86 (13)           | 0.783   | 1.00            |
|              | G3' <sub>M</sub> TMD3/TM2 <i>Ubx<sup>130</sup></i> | 2.43±0.28  | 0.75 (0.61-0.90)                               | 4.90 (13)           | 0.977   | 0.93            |
|              | G3' <sub>Q</sub> TMD3/TM2 <i>Ubx<sup>130</sup></i> | 2.44±0.28  | 0.81 (0.67-0.98)                               | 7.58 (13)           | 0.870   | 1.00            |

|                                                     |           |                  |          |       |      |
|-----------------------------------------------------|-----------|------------------|----------|-------|------|
| G3'S <sub>TMD3</sub> /TM2 <i>Ubx</i> <sup>130</sup> | 2.57±0.29 | 0.86 (0.72-1.03) | 7.73(13) | 0.861 | 1.06 |
|-----------------------------------------------------|-----------|------------------|----------|-------|------|

† CI, confidence intervals.

‡ RR indicates resistance ratio: resistance ratio = LC<sub>50</sub> value of a heterozygous G3'S<sub>TMD3</sub> mutant/LC<sub>50</sub> value of the wild-type *w*<sup>118</sup>.

.
