# Supplementary material for: G3’MTMD3 in the insect GABA receptor subunit, RDL, confers resistance to broflanilide and fluralaner
Source: PubMed Central journal article supplement (PMC10337980; doi:10.1371/journal.pgen.1010814), 2023-06-29
Supplement: pgen.1010814.s017.pdf [file pgen.1010814.s017.pdf]

**S9 Table. Survival rate of larvae of  $w^{1118}$  and homozygous for  $G3'_{TMD3}$  mutations.**

| Genotype                   | Survival number per day after hatching (n = 20 for each replicate) |     |     |     |     |     |     |     |
|----------------------------|--------------------------------------------------------------------|-----|-----|-----|-----|-----|-----|-----|
|                            | 0 d                                                                | 1 d | 2 d | 3 d | 4 d | 5 d | 6 d | 7 d |
| $w^{1118}$ -replicate 1    | 20                                                                 | 20  | 19  | 19  | 19  | 19  | 19  | 19  |
| $w^{1118}$ -replicate 2    | 20                                                                 | 20  | 20  | 20  | 20  | 20  | 20  | 20  |
| $w^{1118}$ -replicate 3    | 20                                                                 | 20  | 19  | 19  | 19  | 19  | 19  | 19  |
| $G3'M_{TMD3}$ -replicate 1 | 20                                                                 | 19  | 16  | 16  | 3   | 1   | 0   | 0   |
| $G3'M_{TMD3}$ -replicate 2 | 20                                                                 | 18  | 17  | 15  | 3   | 2   | 1   | 0   |
| $G3'M_{TMD3}$ -replicate 3 | 20                                                                 | 18  | 15  | 13  | 2   | 2   | 0   | 0   |
| $G3'Q_{TMD3}$ -replicate 1 | 20                                                                 | 17  | 10  | 5   | 4   | 3   | 2   | 0   |
| $G3'Q_{TMD3}$ -replicate 2 | 20                                                                 | 15  | 10  | 6   | 4   | 3   | 0   | 0   |
| $G3'Q_{TMD3}$ -replicate 3 | 20                                                                 | 15  | 9   | 7   | 6   | 4   | 1   | 0   |
| $G3'S_{TMD3}$ -replicate 1 | 20                                                                 | 8   | 6   | 3   | 2   | 1   | 0   | 0   |
| $G3'S_{TMD3}$ -replicate 2 | 20                                                                 | 10  | 7   | 5   | 3   | 2   | 0   | 0   |
| $G3'S_{TMD3}$ -replicate 3 | 20                                                                 | 11  | 7   | 4   | 2   | 0   | 0   | 0   |
