# Supplementary material for: G3’MTMD3 in the insect GABA receptor subunit, RDL, confers resistance to broflanilide and fluralaner
Source: PubMed Central journal article supplement (PMC10337980; doi:10.1371/journal.pgen.1010814), 2023-06-29
Supplement: pgen.1010814.s018.pdf [file pgen.1010814.s018.pdf]

**S10 Table. Crawling speed of larvae of  $w^{1118}$  and homozygous for G3'<sub>TMD3</sub> mutations**

| <b>Genotype</b>       | <b>Crawling speed (<math>\pm</math> SE) (mm/min)</b> | <b>Number</b> |
|-----------------------|------------------------------------------------------|---------------|
| $w^{1118}$            | $2.92 \pm 0.21$                                      | 20            |
| G3' <sub>TMD3</sub> M | $0.52 \pm 0.046$ ***                                 | 20            |
| G3' <sub>TMD3</sub> Q | $0.85 \pm 0.096$ ***                                 | 20            |
| G3' <sub>TMD3</sub> S | $1.13 \pm 0.12$ ***                                  | 20            |

\*\*\* indicates significant difference relative to  $w^{1118}$  as determined by Student's *t*-test with SPSS 17.0 (SPSS Inc., Chicago, IL) when  $P < 0.001$ .
