# Supplementary material for: G3’MTMD3 in the insect GABA receptor subunit, RDL, confers resistance to broflanilide and fluralaner
Source: PubMed Central journal article supplement (PMC10337980; doi:10.1371/journal.pgen.1010814), 2023-06-29
Supplement: pgen.1010814.s019.pdf [file pgen.1010814.s019.pdf]

S11 Table. Primers used in this study

| Name                       | Forward primer (5'-3')                              | Reverse primer (5'-3')                           | Function                |
|----------------------------|-----------------------------------------------------|--------------------------------------------------|-------------------------|
| p-I258T                    | ATTACTTGATTCAAACTTATATTCCA                          | GTTTGAATCAAGTAATATCCCATAGA                       | CsRDL-I258T             |
| p-L275I                    | TGGGTGTCTTTTTGGATCAATAGAAATG                        | GATCCAAAAAGACACCCACGATATGATG                     | CsRDL-L275I             |
| p-V288I                    | AGAGTGTCGTTGGGCATAACAACCTGT                         | TGCCCAACGACACTCTAGCTGGTGTC                       | CsRDL-V288I             |
| p-M298N                    | CTATGACCACCCTAAACTCTTCAACAA                         | GTTTAGGGTGGTCATAGTCAAAACAGT                      | CsRDL-M298N             |
| p-AA303-304NS              | ATGTCTTCAACAAATAATTCTTTGCCCAA                       | AATTATTTGTTGAAGACATTAGGGTGGTC                    | CsRDL-AA303-304NS       |
| p-G319M                    | ATCGATGTCTACCTAATGACCTGCTTCG                        | CATTAGGTAGACATCGATAGATTTTACA                     | CsRDL-G319M             |
| p-G319S                    | ATCGATGTCTACCTATCAACCTGCTTCG                        | TGATAGGTAGACATCGATAGATTTTACA                     | CsRDL-G319S             |
| p-A327S                    | TTCGTGATGGTCTTCTCAAGCCTATT                          | AGAAGACCATCACGAAGCAGGTTCT                        | CsRDL-A327S             |
| p-G336N                    | GAATATGCTACTGTTAACTATATGGCT                         | TTAACAGTAGCATATTCTAATAGGCTT                      | CsRDL-G336N             |
| p-MA338-339IF              | TACTGTTGGCTATATATTTAAACGAATA                        | AATATATAGCCAACAGTAGCATATTCTA                     | CsRDL-MA338-339IF       |
| p-M473V                    | GTCTGCTTTAATCTTGTGTATTGGAT                          | CAAGATTTAAAGCAGACGAAGCAAACG                      | CsRDL-M473V             |
| p-I477D                    | CTTATGTATTGGATAGATTATCTTCAC                         | TCTATCCAATACATAAGATTAAAGCAG                      | CsRDL-I477D             |
| <i>TuRDL</i>               | TTGGCTGTGCTTTTCTCCTT                                | GCATTTTCCAGCTTCTGCTT                             | <i>TuRDL</i>            |
| pGH19- <i>TuRDL</i>        | ATTCCCCGGGGATCCGAATTCGCCACCATGATG<br>ATGTTGATGCTGAT | TCGGCGATCGGGCCCTCTAGATTAAGACTCTT<br>CGTCGGCC     | pGH19- <i>TuRDL</i>     |
| p- <i>TuRDL</i> -G339M     | ATCGATGTTTTCTGATGACTTGTTCG                          | CATCAGGAAAACATCGATACTCTTTACG                     | <i>TuRDL</i> -G339M     |
| <i>DmRDL</i>               | ACCACCATGAGTGATTCAAAAATGG                           | AGTGCCCTGCCAAGTTTGACTCT                          | <i>DmRDL</i>            |
| pGH19- <i>DmRDL</i>        | ATTCCCCGGGGATCCGAATTCGCCACCATGAGT<br>GATTCAAAAATGG  | TCGGCGATCGGGCCCTCTAGACTACTCCTCGC<br>CCAGAAGCA    | pGH19- <i>DmRDL</i>     |
| p- <i>DmRDL</i> -G335M     | ATTGACGTCTATCTGATGACATGCTTCG                        | CATCAGATAGACGTCAATCGATTTGACG                     | <i>DmRDL</i> -G335M     |
| p- <i>AmRDL</i> -G320M     | ATCGACGTTTACCTGATGACATGTTTCG                        | CATCAGGTAAACGTGCGATCGACTTGACG                    | <i>AmRDL</i> -G320M     |
| p- <i>LsRDL</i> -G317M(9c) | ATCGACGTCTACCTGATGACCTGTTTCG                        | CATCAGGTAGACGTGCGATCGACTTGACG                    | <i>LsRDL</i> -G317M(9c) |
| p- <i>CsRDL1</i> -G316M    | ATCGACGTGTATTTGATGACCTGTTTCG                        | CATCAAATACACGTGCGATAGATTTTACG                    | <i>CsRDL1</i> -G316M    |
| <i>Mma1</i>                | ATGAAGAAAAGTCGGGGTCTC                               | CTATTGATGGGGTGTGGGGGCTT                          | <i>Mma1</i>             |
| pGH19- <i>Mma1</i>         | ATTCCCCGGGGATCCGAATTCATGAAGAAAAG<br>TCGGGGTCTC      | TCGGCGATCGGGCCCTCTAGACTATTGATGGG<br>GTGTGGGGGCTT | pGH19- <i>Mma1</i>      |

|                       |                                                                               |                                                                                                        |                                                                               |
|-----------------------|-------------------------------------------------------------------------------|--------------------------------------------------------------------------------------------------------|-------------------------------------------------------------------------------|
| <i>Mmβ2</i>           | ATGTGGAGAGTCCGGAAAAGG                                                         | TTAGTTCACATAGTAAAGCCAA                                                                                 | <i>Mmβ2</i>                                                                   |
| pGH19- <i>Mmβ2</i>    | ATCCCCGGGGATCCGAATTCATGTGGAGAGTC<br>CGGAAAAGG                                 | TCGGCGATCGGGCCCTCTAGATTAGTTCACAT<br>AGTAAAGCCAA                                                        | pGH19- <i>Mmβ2</i>                                                            |
| p- <i>Mmβ2</i> -M310G | ATTGACATGTACCTAGGTGGGTGCTTTG                                                  | ACCTAGGTACATGTCAATGGCTTTGACA                                                                           | <i>Mmβ2</i> -M310G                                                            |
| <i>Dmr1</i> -gRNA1    | TAATACGACTCACTATAAAATCGATTGACGTC<br>TATCTGTTTTAGAGCTAGAAATAGCAAGTTAA<br>AATAA | AGCACCGACTCGGTGCCACTTTTTCAAGTTGA<br>TAACGGACTAGCCTTATTTAACTTGCTATTT<br>CTAGCTCTAA                      | Generation of templates for<br>gRNA <i>in vitro</i> transcription             |
| <i>Dmr1</i> -gRNA2    | TAATACGACTCACTATATCTGGGAACATGCTT<br>CGTTAGTTTTAGAGCTAGAAATAGCAAGTTAA<br>AATAA |                                                                                                        |                                                                               |
| <i>Dmr1</i> -G3-5F    | CCTCTTCGCTATTACGCCAGCAACGATTATTGC<br>TTCGGTTAAGTC                             | AAACAAGTCATTAAGTACACATCTATCGATT<br>TGACGTACGAAATC<br>AAACAAGTCGATAAGTACACATCTATCGATT<br>TGACGTACGAAATC | Generation of DNA fragments<br>for the assembly of donor<br>plasmids          |
| <i>Dmr1</i> -G3M-3F   | GTGTACTTAATGACTTGTGTTTGTGTCATGGTCTTT<br>GCCAGTCTACTG                          | GCTATGACCATGATTACGCCATTGATTCTAG                                                                        |                                                                               |
| <i>Dmr1</i> -G3S-3F   | GTGTACTTATCGACTTGTGTTTGTGTCATGGTCTTT<br>GCCAGTCTACTG                          | GTGCGAGGTG                                                                                             |                                                                               |
| pBSK-s                | TGGCGTAATCATGGTCATAGC                                                         | CTGGCGTAATAGCGAAGAGG                                                                                   |                                                                               |
| pCFD4-gRNAs           | GATATCCGGGTGAACTTCGAAATCGATTGACG<br>TCTATCTGTTTTAGAGCTAGAAATAGCAAG            | CTATTTCTAGCTCTAAACTAACGAAGCATGT<br>TCCAGACGACGTTAAATTGAAAATAGGTC                                       | Generation of DNA fragment<br>with gRNA sequences fused                       |
| G3QDonor              | ATAGATGTGTA CTTACAGACTTGT TTT                                                 | TGTAAGTACACATCTATCGATTTGACG                                                                            | Generation of mutated donor<br>plasmid                                        |
| rd1335det             | GCAACTATTCGCGTTTAGCC                                                          | CTGGCTGTTGATCGACGACT                                                                                   | Amplification of the genomic<br>region of <i>Drosophila</i> for<br>sequencing |

Note, the restriction enzyme sites for *Eco* RI and *Xba* I are shown in red, and the Kozak sequence is indicated in green, the nucleotide sequences matching the pGH19 vector are in italics. The blue nucleotides are the mutant sites.
